# Supplementary material for: FluxPyt: a Python-based free and open-source software for 13 C-metabolic flux analyses
Source: PeerJ journal article supplement (doi:10.7717/peerj.4716), 2018-04-27
Supplement: Data_S3.pdf [file Data_S3.pdf]

```
Python 3.6.1 |Anaconda custom (64-bit)| (default, May 11 2017, 13:25:24) [MSC v.
1900 64 bit (AMD64)]
Type "copyright", "credits" or "license" for more information.
```

```
IPython 5.3.0 -- An enhanced Interactive Python.
?          -> Introduction and overview of IPython's features.
%quickref  -> Quick reference.
help       -> Python's own help system.
object?    -> Details about 'object', use 'object??' for extra details.
```

```
In [1]:
```

```
In [1]: import fluxpyt
```

```
In [2]: fluxpyt.main()
```

```
Enter file name:
```

```
tca
```

```
Is data for natural isotope correction available (y/n)?
```

```
n
```

```
Enter Number of Iterations
```

```
10
```
